# Supplementary material
Source: publisher site journal article supplement (https://www.dovepress.com/get_supplementary_file.php?f=485581.docx)
Supplement: Supplementary file 1 [file get_supplementary_file.php]

**Supplementary Data**

***Characterizations of CGA-Q[6] complexes***

The FTIR analysis results (Figure S1) showed that Q[6]@CGA had a hydroxyl stretching peak of CGA at 2936 cm-1, which is the stretching vibration of alkyl C-H of CGA. Additionally, a weak interaction between CGA and Q[6] was observed.

The TGA of CGA, Q[6], and Q[6]@CGA (Figure S2) showed that the weight loss of the first stage of CGA was 16%, which occurred at 0–59°C. A rapid weight loss of 68% occurred at 221–401°C. The weight loss of the first stage of Q[6] was 5%. A rapid weight loss of 61% occurred at 0–134°C and 317–400°C. A rapid weight loss of 9% occurred at 0–105°C in the first stage of Q[6]@CGA, and a rapid weight loss of 47% was observed at 257–336°C. The proportions of weight loss due to water evaporation were 16% and 5% in the first sections of CGA and Q[6], respectively, and 9% in Q[6]@CGA. The collapse of the long carbon backbone of CGA occurred at 221–401°C, Q[6] at 317–400°C, and Q[6]@CGA at 257–336°C. No obvious shift was observed at the turning point of weightlessness compared to the pure CGA and Q[6].

Free CGA, Q[6], and Q[6]@CGA (200 μM each) were treated with MC3T3-E1 for 5 days. In the CCK-8 (Figure S3) analysis, the free CGA group showed obvious cytotoxicity, the Q[6]@CGA group also demonstrated an inhibitory effect on the proliferation of the cells, while the Q[6] group showed no cytotoxicity. According to the cytotoxicity test results, the cytotoxicity of the complex was not significantly reduced compared to that of the free CGA.

***Heat release curve of CGA, Q[6], Q[6]@CGA, Q[7], Q[7]@CGA, and Q[7]@2CGA***

The heat release curves of CGA, Q[6], Q[6]@CGA, Q[7]@CGA, and Q[7]@2CGA (Figure S4) showed that the heat release process of Q[6]@CGA was similar to that of Q[6], which is approximately the superposition of CGA and Q[6]. The heat release process of Q[7]@CGA was similar to that of Q[7]@2CGA and different from those of CGA and Q[7]. This is consistent with the thermogravimetric analysis results described in the text.


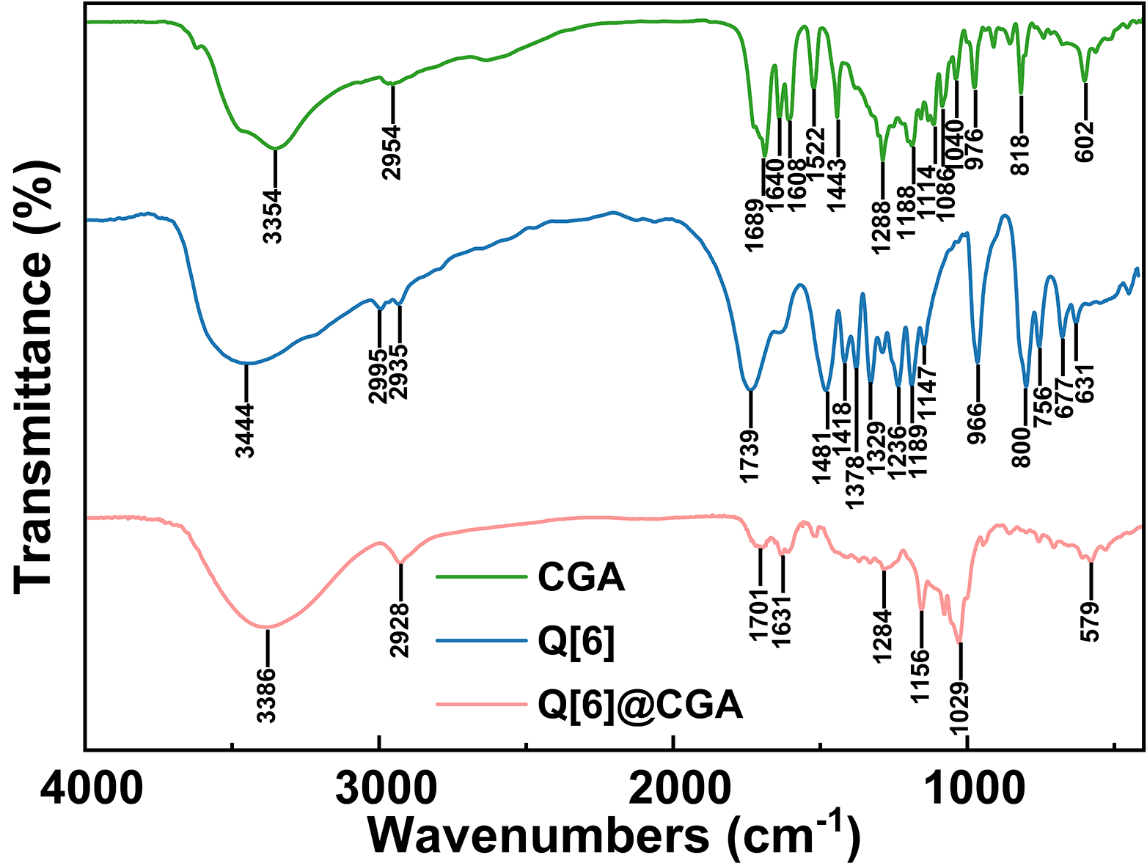


**Figure S1** FTIR patterns of CGA, Q[6], and Q[6]@CGA.

**
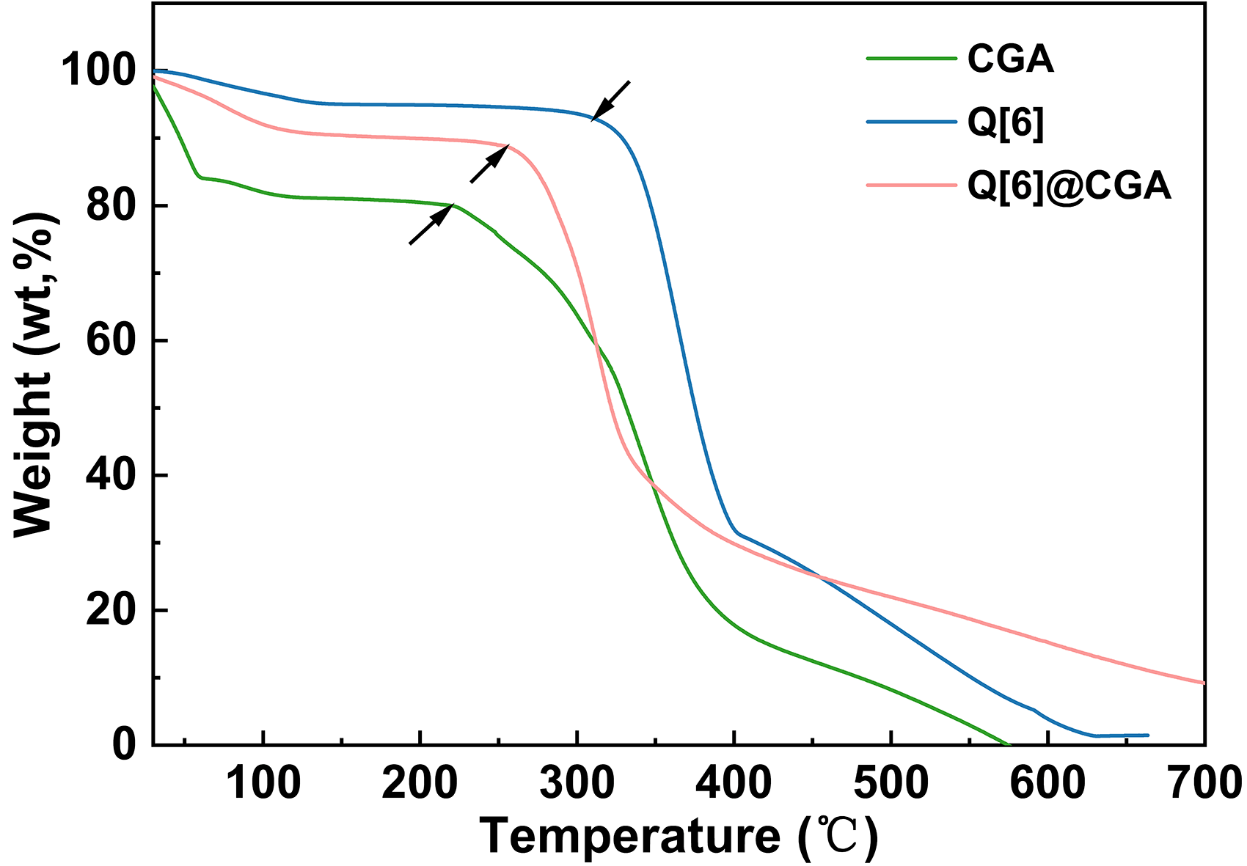
**

**Figure S2** TGA diagram of CGA, Q[6], and Q[6]@CGA.

**
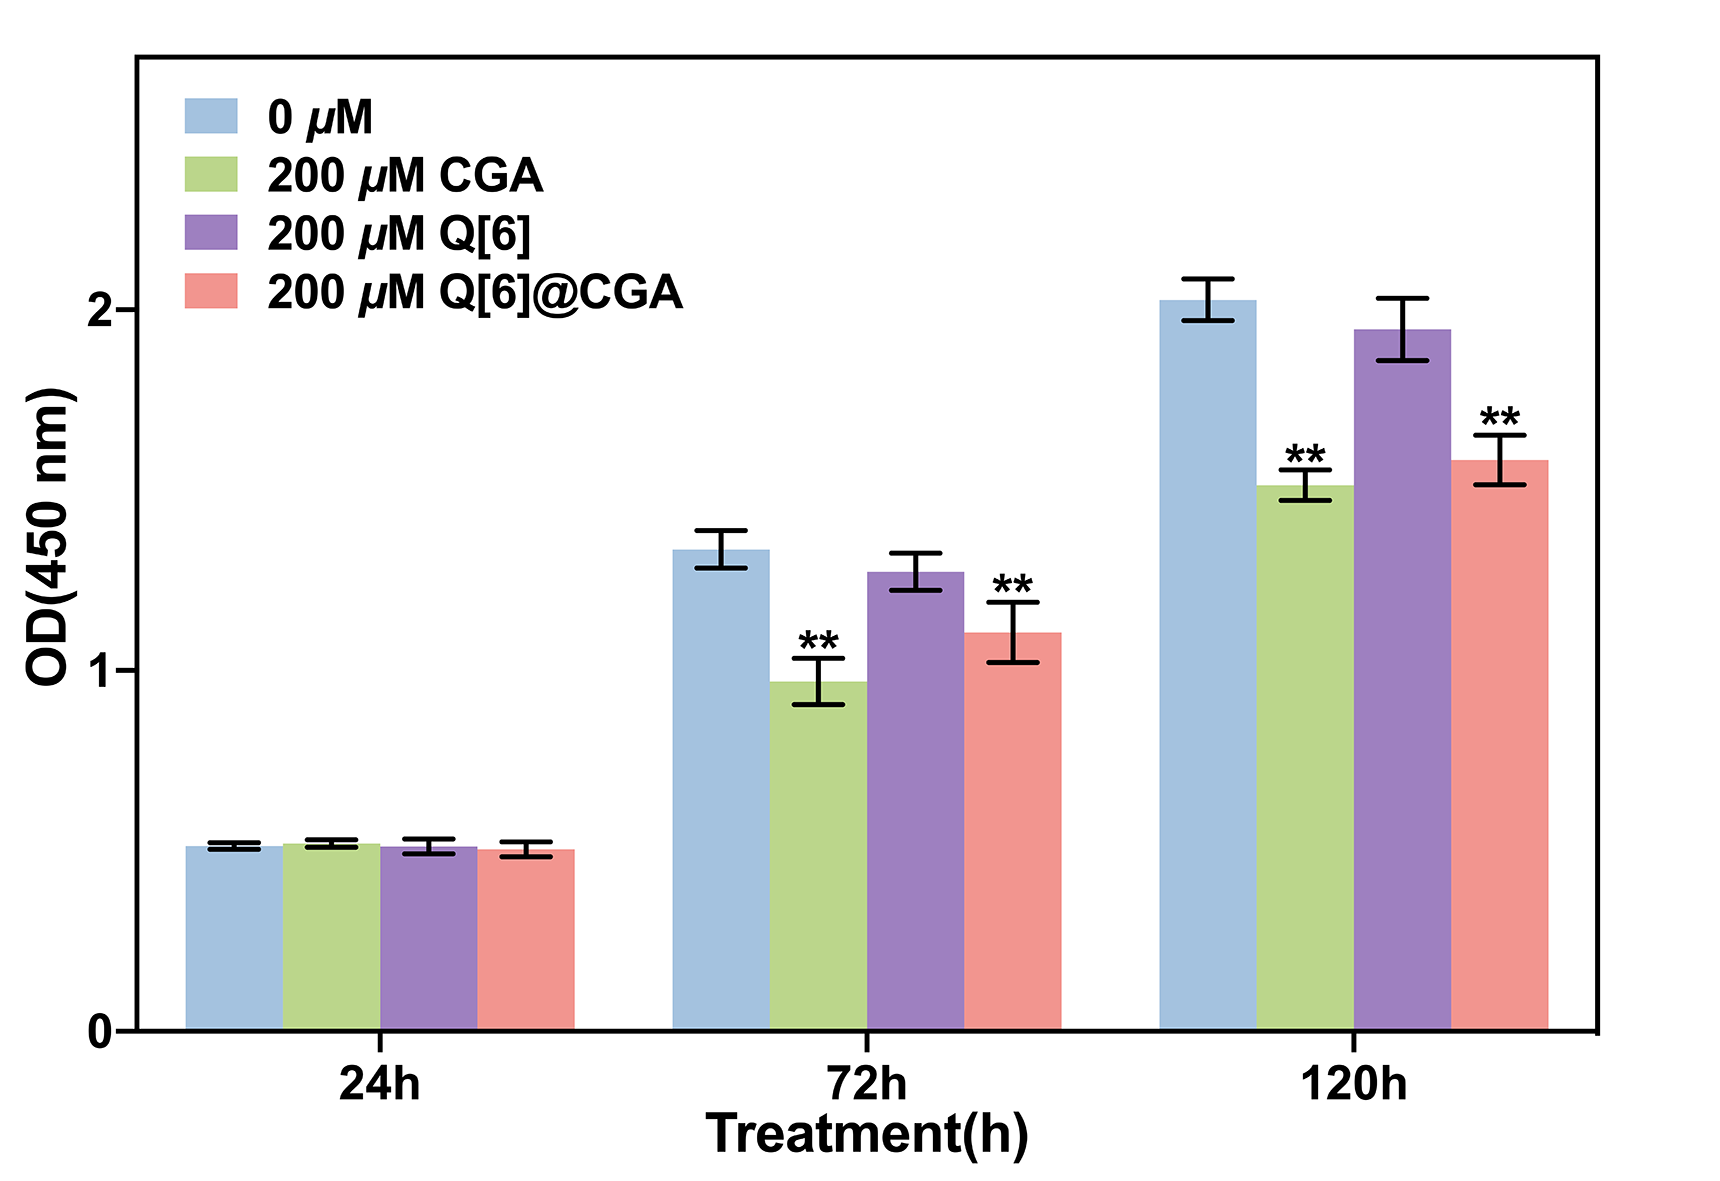
**

**Figure S3** CCK-8 of results of MC3T3-E1 cells with free CGA, Q[6], and Q[6]@CGA for 1, 3 and 5 days. ** *p*＜0.01 represent significant differences compared to the control group.

**
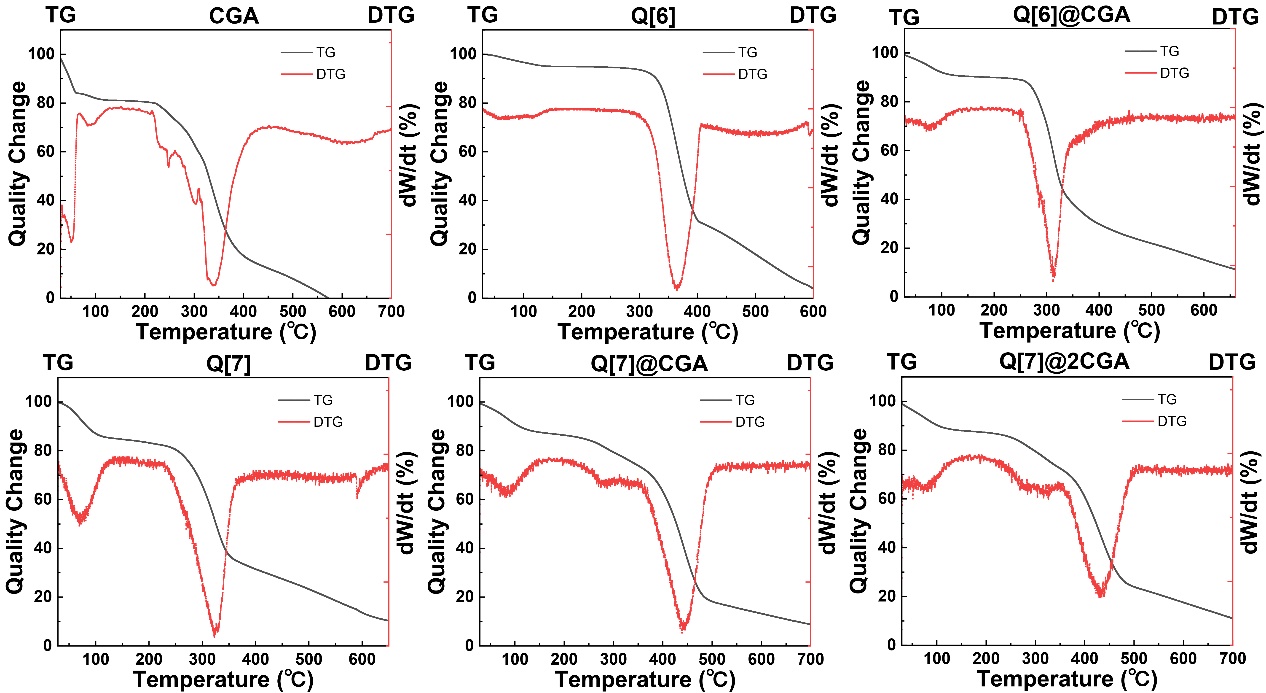
**

**Figure S4** TGA and DTG patterns of CGA, Q[6], Q[6]@CGA, Q[7], Q[7]@CGA, and Q[7]@2CGA.
